# Supplementary material for: An investigation of Al2O3 induced variations in the structural parameters in strontium borosilicate glasses using solid state NMR
Source: Royal Society of Chemistry journal article supplement (doi:10.1039/d3cp00751k), 2023-01-01
Supplement: d3cp00751k1.pdf [file d3cp00751k1.pdf]

## Electronic Supplementary Information

### An investigation of Al<sub>2</sub>O<sub>3</sub> induced variations in the structural parameters in strontium borosilicate glasses using solid state NMR

*Kavya Illath,<sup>a,b</sup> Prasanta K. Ojha,<sup>c</sup> Sangram K Rath,<sup>c</sup> and T.G. Ajithkumar<sup>a,b\*</sup>*

a. Central NMR Facility and Physical/Materials Chemistry Division, CSIR-National Chemical Laboratory, Pune 411008, Maharashtra, India

b. Academy of Scientific and Innovative Research (AcSIR), Ghaziabad-201002, India

c. Naval Materials Research Laboratory, Ambernath, Thane 421506, Maharashtra, India

Table – S1: Radius of oxide ions and modifier atom <sup>1-3</sup>

| Oxide ions                               | Radius (Å) |
|------------------------------------------|------------|
| SrO                                      | 1.4        |
| AlO <sub>6</sub>                         | 1.4        |
| AlO <sub>5</sub>                         | 1.334      |
| AlO <sub>4</sub>                         | 1.437      |
| BO <sub>4</sub>                          | 1.204      |
| BO <sub>3</sub>                          | 1.187      |
| SiO <sub>4</sub>                         | 1.306      |
| Sr <sup>+2</sup> ion in SrO              | 1.18       |
| Al <sup>+3</sup> ion in AlO <sub>6</sub> | 0.535      |

Table – S2: Molar volume and oxygen number density of the glass samples

| Glass Code | Molar Volume (cc/mol) | Oxygen number Density (Angstrom <sup>-3</sup> ) |
|------------|-----------------------|-------------------------------------------------|
| SBS        | 24.97                 | 0.0523                                          |
| SABS 5     | 25.44                 | 0.051                                           |

|         |       |        |
|---------|-------|--------|
| SABS 10 | 25.76 | 0.0499 |
| SABS 15 | 25.94 | 0.0492 |
| SABS 20 | 26.69 | 0.0474 |
| SABS 25 | 27.31 | 0.046  |
| SABS 30 | 27.79 | 0.0448 |

## Calculation of Oxygen packing fraction

The oxygen packing fraction is calculated using Equation 2. The details of the calculation of the oxygen packing fraction of one of the glass materials are explained below. In the case of SBS, the  $V_o$  in Equation 2 is calculated as,

$$V_o = \frac{4}{3}\pi \frac{F_{BO_3} C_{BO_3} r_{BO_3}^3 + F_{BO_4} C_{BO_4} r_{BO_4}^3 + F_{SiO_4} C_{SiO_4} r_{SiO_4}^3}{F_{BO_3} C_{BO_3} + F_{BO_4} C_{BO_4} + F_{SiO_4} C_{SiO_4}}$$

Where  $F_{BO_3}$ ,  $F_{BO_4}$ , and  $F_{SiO_4}$  are the fraction of  $BO_3$ ,  $BO_4$  and  $SiO_4$  respectively and  $C_{BO_3}$ ,  $C_{BO_4}$  and  $C_{SiO_4}$  are the coordination number and  $r_{BO_3}$ ,  $r_{BO_4}$ ,  $r_{SiO_4}$  are the radii of the  $BO_3$ ,  $BO_4$  and  $SiO_4$  units respectively. The  $\rho_o$  is calculated by using Equation No. 1. The  $V_M \rho_M$  of the modifier atom (in these case Sr) is further calculated by Equation 5.

$$V_M \rho_M = \frac{4}{3}\pi r_{Sr^{2+}}^3 + \rho_{Sr}$$

Where  $r_{Sr^{2+}}$  is the radii of the  $Sr^{2+}$  in the  $SrO$  and  $\rho_{Sr}$  is the number density of the Sr atoms. In the case of Al incorporated samples,  $AlO_5$  and  $AlO_6$  were also included in the calculation of  $V_M \rho_M$ . The  $\rho_{Sr}$  can be calculated using the following equation.

$$\rho_{Sr} = \frac{N_{Sr} N_{avo}}{V_m}$$

$N_{Sr}$  is the number of Sr atoms in the composition, calculated from the molecular formula.  $N_{avo}$  is the Avogadro number, and  $V_m$  is the molar volume

## <sup>11</sup>B deconvolution procedure

The quadrupolar coupling constant ( $Cq$ ) and asymmetric constant ( $\eta$ ) value of the different borate species are deduced from the fitting of the  $^{11}\text{B}$  MQMAS spectra (shown in Fig S1). These parameters are used for deconvoluting the  $^{11}\text{B}$  MAS spectra. The consistency in the

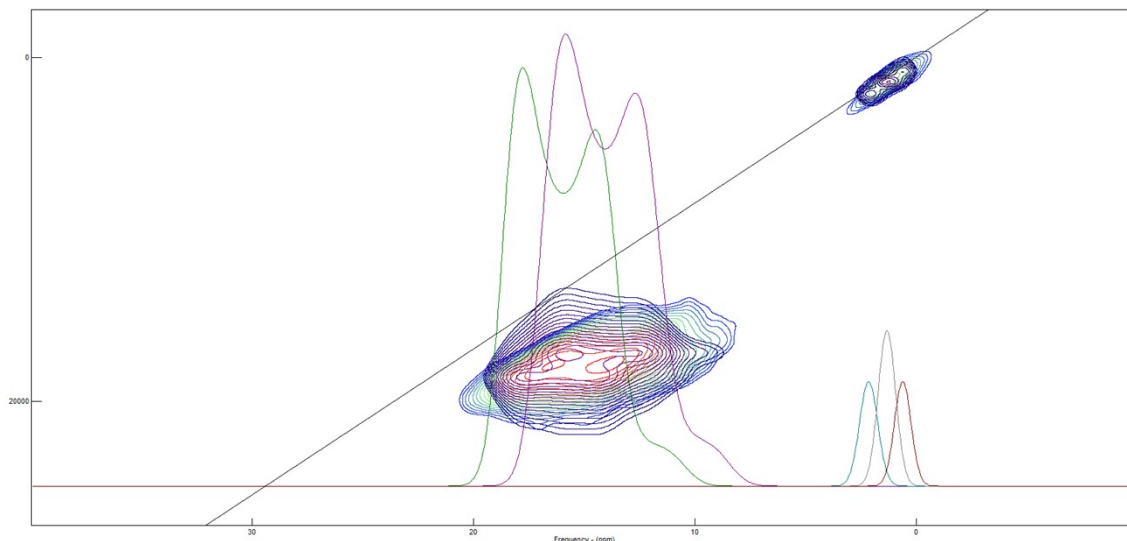

Fig. S1.  $^{11}\text{B}$  MQMAS NMR spectra of SABS 30 fitted with two components for the  $\text{BO}_3$  species and three for the  $\text{BO}_4$  species.

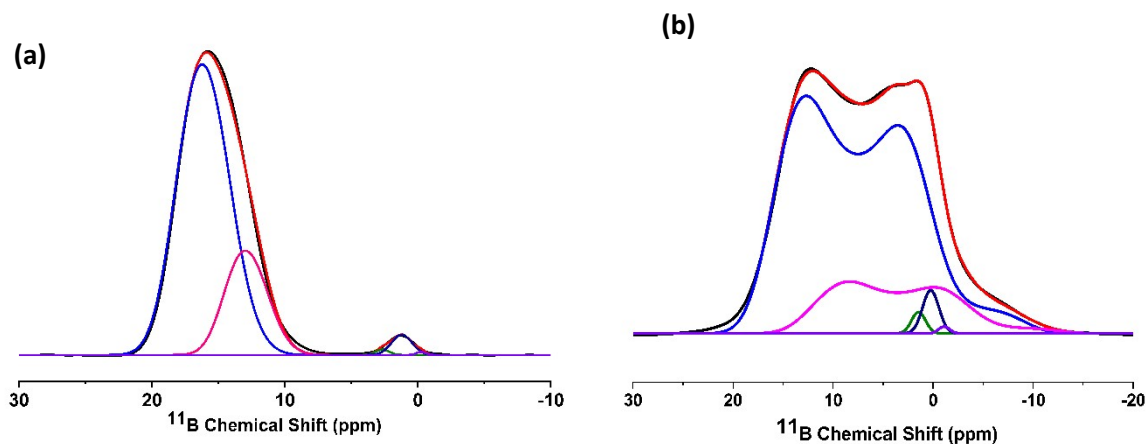

Fig. S2.  $^{11}\text{B}$  MAS NMR spectra of SABS 30 (Black, Experimental; Red, Fitted ) recorded at (a) 16.5T and (b) 9.4T accompanied by its components ( Blue,  $^{3}\text{B}$  (non-ring); Magenta,  $^{3}\text{B}$  (ring); Green,  $^{4}\text{B}$  (0B, 4Si); Indigo,  $^{4}\text{B}$  (1B,3Si); Violet;  $^{4}\text{B}$  (2B,2Si) ) derived from deconvolution.

fitting parameters were further checked by deconvoluting the spectra recorded at different field strengths. The deconvoluted spectra of SABS 30 recorded at two field strengths (16.5T and 9.4T

are given in Fig S2. The deconvolution of the spectra from both field strengths gives the same values for the parameters  $Cq$  and  $\eta$  for B (III) and B (IV) units. However, the percentage of occupancy of these species is different in both cases. It is observed that the 2.5mm triple resonance probe of the Bruker 700MHz (16.5T) spectrometer gives a background signal which leads to the wrong estimation of the percentage of occupancy of the B (III) and the B (IV) units. Thus the  $^{11}\text{B}$  NMR data from Jeol 400 MHz (9.4T) has been used for the deconvolution and the quantitative estimation of different sites.

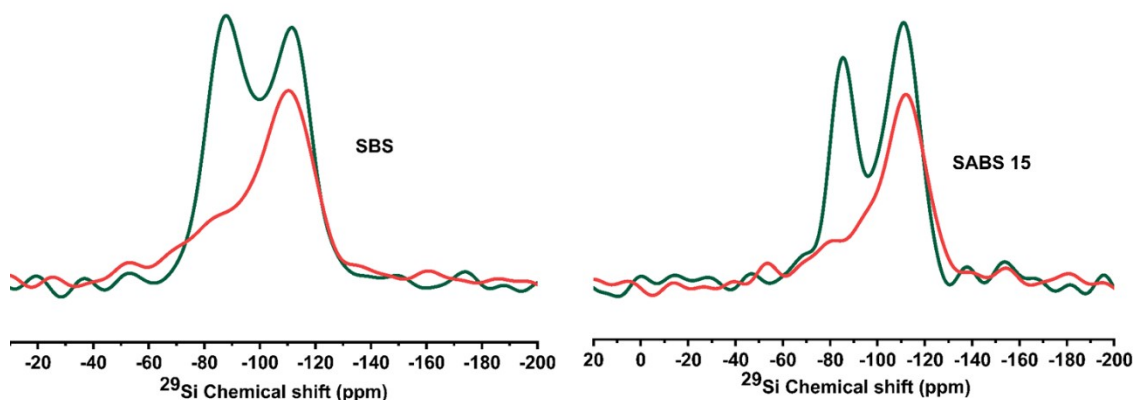

Fig. S2  $^{29}\text{Si}$  static ( Red ) and MAS NMR (Green) of SBS and SABS 15 glasses

## References

- 1 R. D. Shannon and C. T. Prewitt, Effective ionic radii in oxides and fluorides, *Acta Crystallogr. Sect. B Struct. Crystallogr. Cryst. Chem.*, 1969, **25**, 925–946.
- 2 B. C. Bunker, R. J. Kirkpatrick and R. K. Brow, Local Structure of Alkaline-Earth Boroaluminate Crystals and Glasses: I, Crystal Chemical Concepts—Structural Predictions and Comparisons to Known Crystal Structures, *J. Am. Ceram. Soc.*, 1991, **74**, 1425–1429.
- 3 L. S. Du and J. F. Stebbins, Solid-state NMR study of metastable immiscibility in alkali borosilicate glasses, *J. Non. Cryst. Solids*, 2003, **315**, 239–255.
